# Supplementary material for: Reversible structural phase transition, ferroelectric and switchable dielectric properties of an adduct molecule of hexamethylenetetramine ferrocene carboxylic acid
Source: Royal Society of Chemistry journal article supplement (doi:10.1039/c7ra06429b), 2017-01-01
Supplement: c7ra06429b1.pdf [file c7ra06429b1.pdf]

# Reversible structural phase transition, ferroelectric and switchable dielectric properties in an adduct molecule of hexamethylenetetramine ferrocene carboxylic acid

Yun-Zhi Tang, \* Yi Liu, Ji-Xing Gao, Chang-Feng Wang, Bin Wang, Yu-Hui Tan, He-Rui Wen

## Supporting Materials

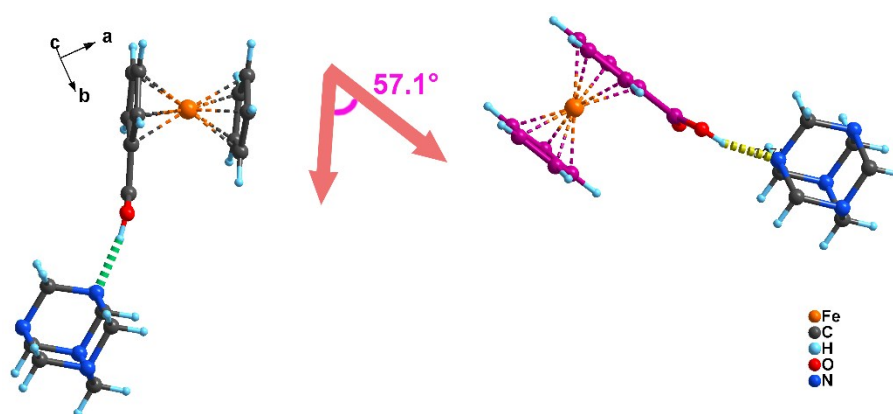

Figure S1 the torsion angle between the two cyclopentadienyl carboxylic acid planes of **1-LTP**.

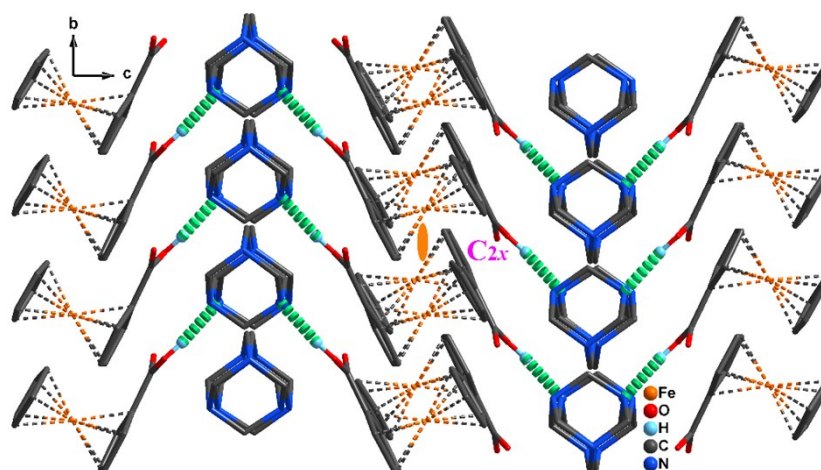

Fig. S2 the packing structure of **1-RTP** shows the symmetrical operations along the *a*-axis direction

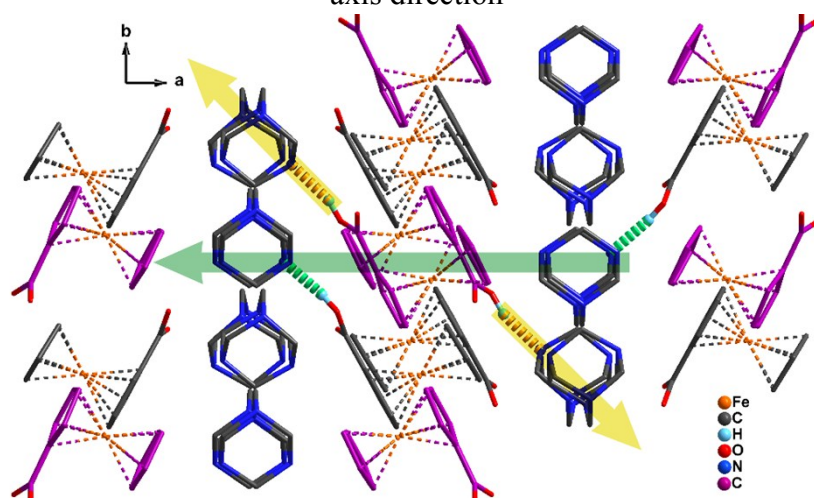

Fig. S3 the packing structure of **1-LTP** shows the symmetrical operations along the *c*-axis direction

## 2 Calculation of $\Delta S$ and $N$ for Compound 1

According to the Boltzmann equation,  $\Delta S = nR \ln(N)$ , where  $\Delta S$  is the entropy change extracted from the  $C_p$  data,  $n$  is the number of guest molecules per mole ( $n = 1$ , here),  $R$  is the gas constant, and  $N$  is the number of possible orientations for the disordered system. The calculations of  $\Delta S$  and  $N$  values on the heating and cooling processes of **1** are as follows:

### 2.1 In the cooling cycle mode

$$\Delta S_1 = \int_{T_1}^{T_2} \frac{Q}{T} dT$$

$$\approx \frac{\Delta H}{TC}$$

$$= \frac{0.9171 \text{ J}\cdot\text{g}^{-1} \times 370.24 \text{ g}\cdot\text{mol}^{-1}}{182.0 \text{ K}}$$

$$= 1.866 \text{ J}\cdot\text{mol}^{-1}\cdot\text{K}^{-1}$$

$$\Delta S_1 = R \ln N_1$$

$$N_1 = \exp\left(\frac{\Delta S_1}{R}\right) = \exp\left(\frac{1.866 \text{ J}\cdot\text{mol}^{-1}\cdot\text{K}^{-1}}{8.314 \text{ J}\cdot\text{mol}^{-1}\cdot\text{K}^{-1}}\right)$$

$$= 1.252$$

## 2.2 In the heating cycle mode

$$\Delta S_2 = \int_{T_1}^{T_2} \frac{Q}{T} dT$$

$$\approx \frac{\Delta H}{TC}$$

$$= \frac{0.9038 \text{ J}\cdot\text{g}^{-1} \times 370.24 \text{ g}\cdot\text{mol}^{-1}}{186.9 \text{ K}}$$

$$= 1.790 \text{ J}\cdot\text{mol}^{-1}\cdot\text{K}^{-1}$$

$$\Delta S_2 = R \ln N_2$$

$$N_2 = \exp\left(\frac{\Delta S_2}{R}\right) = \exp\left(\frac{1.790 \text{ J}\cdot\text{mol}^{-1}\cdot\text{K}^{-1}}{8.314 \text{ J}\cdot\text{mol}^{-1}\cdot\text{K}^{-1}}\right)$$

$$= 1.240$$

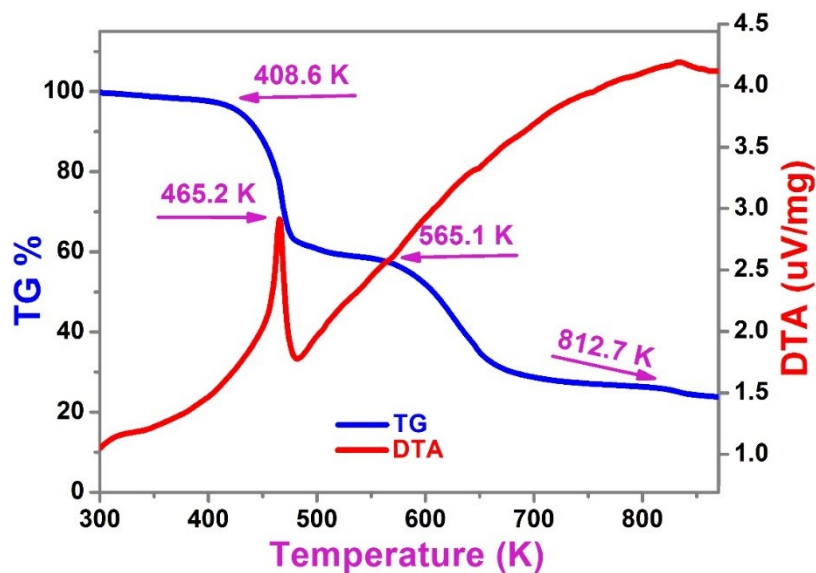

Figure S4 Thermo-gravimetric and Differential Thermal Analysis (TG-DTA) curves for **1**
